# Supplementary material for: Biomimetic studies on the mechanism of stereoselective lanthionine formationElectronic supplementary information (ESI) available: separation of the diastereomers of 5; cleavage of peptides from resins; COSY NMR spectrum of the product obtained from cyclization of both E-1 and 19. See http://www.rsc.org/suppdata/ob/b3/b304945k/
Source: Royal Society of Chemistry journal article supplement (doi:10.1039/b304945k), 2003-01-01

# Biomimetic studies on the mechanism of stereoselective lanthionine formation

# Supporting Information

# Yantao Zhu, Matt D. Gieselman, Hao Zhou, Olga Averin,

# and Wilfred A. van der Donk*

*Separation of the various diastereomers of 5.*

A Whelk-O1 chiral stationary column was used to determine the stereochemical purity of *anti*-8 prepared according to Scheme 2. A single peak was observed (Fig. A) under conditions when all four diastereomers of 8 prepared by Michael addition to Z-dehydrobutyrine (Scheme 2) are resolved (Fig. B, 1% iPrOH in hexane at 1 mL/min). Coinjection of the racemic and pure material confirmed the stereochemical purity of *anti*-8: since it is the last eluting peak, its enantiomer cannot be buried under the tail of the peak and would have been visible in Fig. A if present.


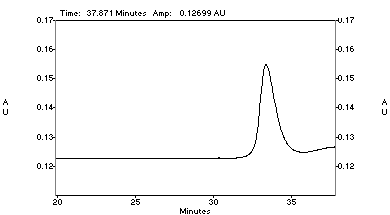
(A) (2*R*,3*S*)-8 (*anti*-8) (B) ± *syn*-& *anti*-8 (C) Coinjection of (2*R*,3*S*)-8

and ± *syn*-& *anti*-8

***Cleavage of peptides from resins.1*** The resin was isolated by filtration, washed with ethanol (1 mL) and CH2Cl2 (2 x 1 mL), and dried in vacuo in a desiccator for 1 h. In general the peptides were cleaved with water (0.5 mL), anisole (0.5 mL), thioanisole (0.5 mL), and TFA (10 mL). When cleavage of the Trt-group from Cys was desired, triisopropylsilane was added to the cocktail. The cleavage reactions were stirred at rt for approximately 2 h. The solution was filtered through a coarse frit into a 250 mL round bottom flask and the vial was rinsed with TFA (4 x 1 mL). TFA was removed by rotary evaporation at 30 C, and diethyl ether (10 mL) was added to precipitate the peptide. The resulting white residue was recovered by filtration. The peptides were analyzed and purified by RP-HPLC on Vydac C-18 columns (0.46 cm x 25 cm analytical, 2.2 cm x 25 cm preparative). They were eluted in 0.1% TFA in acetonitrile/water with linear gradients optimized for each peptide with a flow rate of 1 mL/min on the analytical column and 8 mL/min on the preparative column.

***1*** *Rainin PS3 Automated Solid Phase Peptide Synthesizer: User Guide*; Rainin Instrument Company, 1998.

##### COSY NMR spectrum of the product obtained from cyclization of both *E*-**1** and **19**.


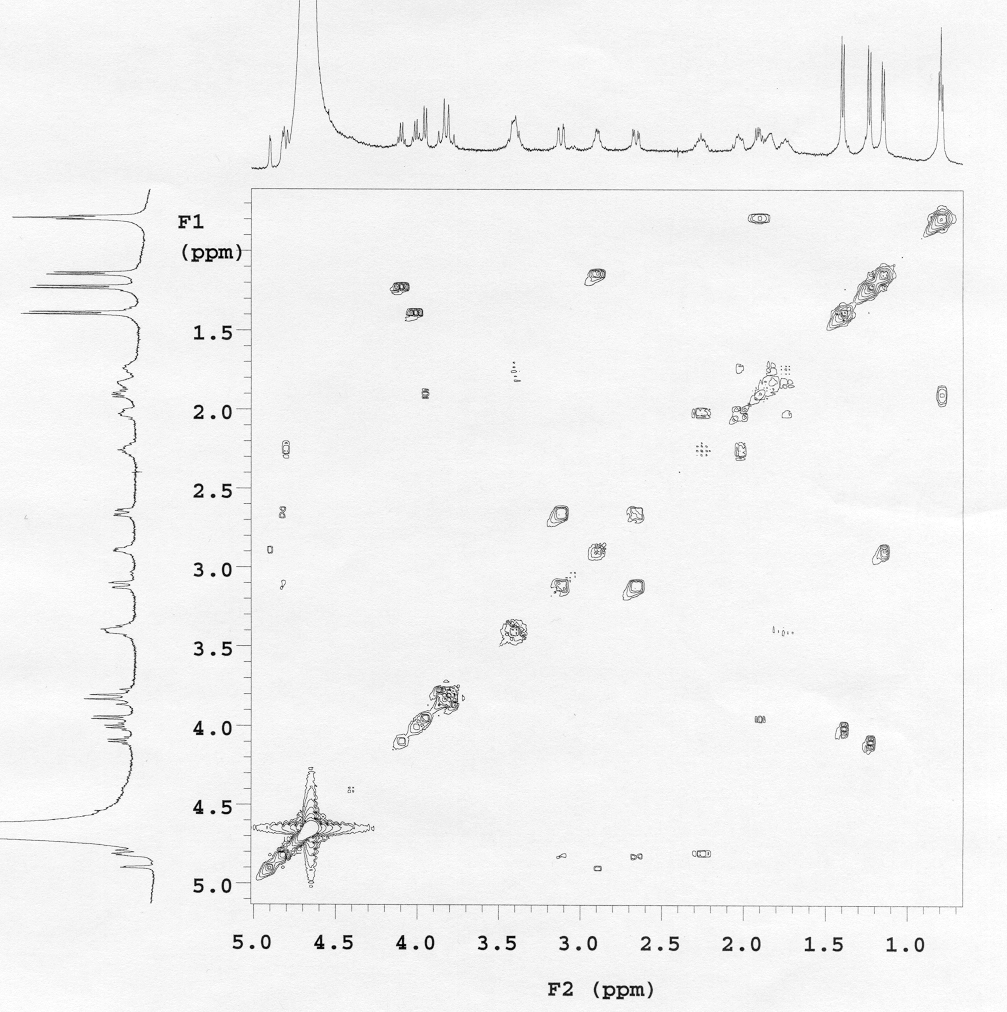

Supplement: b304945k.doc [file b304945k.doc]
